# Supplementary material
Source: publisher site journal article supplement (https://www.dovepress.com/get_supplementary_file.php?f=310260.docx)
Supplement: Supplementary file 1 [file get_supplementary_file.php]

# Supplementary material

# The English Food Frequency Questionnaire is reproduced/adapted from Haftenberger M, Heuer T, Heidemann C, Kube F, Krems C, Mensink GBM. Relative validation of a food frequency questionnaire for national health and nutrition monitoring. *Nutr J*. 2010;9:36. Creative Commons Attribution License (https://creativecommons.org/licenses/by/2.0).

| English | Romanian |
| --- | --- |
| **Food frequency questionnaire** | **Chestionar de frecvență alimentară** |
| **Milk**  1. In the last 4 weeks, how many times have you consumed milk (including coffee milk, cereals)? *  *Choose only one option*   - - Never   - 1 time a month   - 2-3 times a month   - 1-2 times a week   - 3-4 times a week   - 5-6 times a week   - 1 time a day   - twice a day   - 3 times a day   - 4-5 times a day   - more frequent than 5 times a day   **Milk**  1a. When you drink milk, how much do you drink, most often? *  *Choose only one option*   - - ½ Glass (or less)   - 1 glass (200 ml)   - 2 Glasses   - 3 Glasses   - 4 Glasses (or more)   1b. What type of milk do you drink most often? *  *Choose only one option*   - - Whole milk (at least 3.5% fat)   - Low fat milk (1.5% fat)   - Skimmed milk (maximum 0.3% fat)   - Soya milk   - Lactose-free milk   - Another type   **Sugar-sweetened soft drinks**  2. How many times have you consumed sugar-sweetened soft drinks (eg cola, lemonade, tea-based soft drinks, malt beer, energy drinks) in the last 4 weeks? Please DO NOT include light or sugar-free drinks *  *Choose only one option*   - - Never   - 1 time per l one   - 2-3 times a month   - 3-4 times a week   - 5-6 times a week   - 1 time a day   - twice a day   - 3 times a day   - 4-5 times a day   - more frequent than 5 times a day   **Sugar-sweetened soft drinks**  2a. When you drink sugar- sweetened soft drinks how much do you drink, most often? *  *Choose only one option*   - - ½ Glass (or less)   - 1 glass (200 ml)   - 2 Glasses   - 3 Glasses   - 4 Glasses (or more)   **Light soft drinks**  3. Over the past 4 weeks, how often have you drank low-calorie soft-drinks (eg: light soft-drinks)? *  *Choose only one option*   - - Never   - 1 time a month   - 2-3 times a month   - 1-2 times a week   - 3-4 times a week   - 5-6 times a week   - 1 time a day   - twice a day   - 3 times a day   - 4-5 times a day   - more frequent than 5 times a day   **Light soft drinks**  3a. When you drink light soft drinks how much do you drink, most often? *  *Choose only one option*   - - ½ Glass (or less)   - 1 glass (200 ml)   - 2 Glasses   - 3 Glasses   - 4 Glasses (or more)   **Fruit juice**  4. In the last 4 weeks, how many times have you consumed fruit juice (for example, orange juice, apple juice, cherry juice)? Diluted fruit juice is also considered. *  *Choose only one option*   - - Never   - 1 time a month   - 2-3 times a month   - 1-2 times a week   - 3-4 times a week   - 5-6 times a week   - 1 time a day   - 2 times a day   - 3 times a day   - 4-5 times a day   - more frequent than 5 times a day   **Fruit juice**  4a. When you drink fruit juice how much do you drink, most often? *  *Choose only one option*   - - ½ Glass (or less)   - 1 glass (200 ml)   - 2 Glasses   - 3 Glasses   - 4 glasses (or more)   4b. How do you usually consume the juice? *  *Choose only one option*   - - Undiluted   - About ¼ juice and ¾ water   - Approximately active juice and water   - About ¾ juice and ¼ water   **Vegetable juice**  5. In the last 4 weeks, how many times have you consumed vegetable juice (eg tomato juice or carrot juice)? It is also considered diluted vegetable juice. *  *Choose only one option*   - - Never   - 1 time a month   - 2-3 times a month   - 1-2 times a week   - 3-4 times a week   - 5-6 times a week   - 1 time a day   - twice a day   - 3 times a day   - 4-5 times a day   - more frequent than 5 times a day   **Vegetable juice**  5a. When you add vegetable juice how much do you drink, most often? *  *Choose only one option*   - - ½ Glass (or less)   - 1 glass (200 ml)   - 2 Glasses   - 3 Paha re   - 4 Glasses (or more)   5b. How do you usually consume the juice? *  *Choose only one option*   - - Undiluted   - About ¼ juice and ¾ water   - About juice and water   - About ¾ juice and ¼ water   **Water**  6. In the last 4 weeks, how many times have you consumed water ( tap water, flat water, drilling water, mineral water, flavored water) ? *  *Choose only one option*   - - Never   - 1 day a month   - 2-3 times a month   - 1-2 times a week   - 3-4 times a week   - 5-6 times a week   - 1 time a day   - twice a day   - 3 times a day   - 4-5 times a day   - more frequent than 5 times a day   **Water**  6a. When you consume water how much do you drink, most often? *  *Choose only one option*   - - ½ Glass (or less)   - 1 glass (200 ml)   - 2 Glasses   - 3 Glasses   - 4 Glasses (or more)   **Fruit and herbal teas**  7. In the last 4 weeks, how many times have you consumed fruit tea or herbal tea? *  *Choose only one option*   - - Never   - 1 time a month   - 2-3 times a month   - 1-2 times a week   - 3-4 times a week   - 5-6 times a week   - 1 time a day   - twice a day   - 3 times a day   - 4-5 times a day   - more frequent than 5 times a day   **Fruit and herbal teas**  7a. When you drink fruit or plant tea how much do you drink, most often? *  *Choose only one option*   - - ½ Cup (or less)   - 1 cup (200 ml)   - 2 Cups   - 3 Cups   - 4 Cups (or more)   7b. Are you used to sweetening tea with sugar? We are not referring to the use of low-calorie sweeteners. *  *Choose only one option*   - - No   - Yes, about 1 teaspoon per cup   - Yes, 2 teaspoons to a cup   - Yes, 3 teaspoons (or more) per cup   **Black or green tea**  8. In the last 4 weeks, how many times have you drunk black or green tea? *  *Choose only one option*   - - Never   - 1 time a month   - 2-3 times a month   - 1-2 times a week   - 3-4 times a week   - 5-6 times a week   - 1 time a day   - twice a day   - 3 times a day   - 4-5 times a day   - more frequent than 5 times a day   **Black or green tea**  8a. When you drink green or black tea how much do you drink, most often? *  *Choose only one option*   - - ½ Cup (or less)   - 1 cup (200 ml)   - 2 Cups   - 3 Cups   - 4 Cups (or more)   8b. Are you used to sweetening tea with sugar? We are not referring to the use of low-calorie sweeteners. *  *Choose only one option*   - - No   - Yes, about 1 teaspoon per cup   - Yes, 2 teaspoons to a cup   - Yes, 3 teaspoons (or more) per cup   **Coffee**  9. In the last 4 weeks, how many times have you consumed coffee (including cappuccino, latte macchiato, espresso)? *  *Choose only one option*   - - Never   - 1 time a month   - 2-3 times a month   - 1-2 times a week   - 3-4 times a week   - 5-6 times a week   - 1 time a day   - twice a day   - 3 times a day   - 4-5 times a day   - more frequent than 5 times a day   **Coffee**  9a. When you drink coffee how much do you drink, most often? *  *Choose only one option*   - - ½ Cup (or less)   - 1 cup (150 ml)   - 2 Cups   - 3 Cups   - 4 Cups (or more)   9b. Are you used to sweetening coffee with sugar? We are not referring to the use of low -calorie sweeteners. *  *Choose only one option*   - - No   - Yes, about 1 teaspoon per cup   - Yes, 2 teaspoons to a cup   - Yes, 3 teaspoons (or more) per cup   **Alcoholic beer**  10. In the last 4 weeks, how often have you drunk beer (alcoholic)? *  *Choose a single mouth option*   - - Never   - 1 time a month   - 2-3 times a month   - 1-2 times a week   - 3-4 times a week   - 5-6 times a week   - 1 time a day   - twice a day   - 3 times a day   - 4-5 times a day   - more frequent than 5 times a day   **Alcoholic beer**  10a. When you drink beer with alcohol, how much do you drink, most often? *  *Choose only one option*   - - ½ glass (or less)   - 1 bottle (500 ml)   - 2 bottles   - 3 bottles   - 4 bottles (or more)   **Non-alcoholic beer**  11. In the last 4 weeks, how many times have you drunk non- alcoholic beer? *  *Choose only one option*   - - Never   - 1 time a month   - 2-3 times a month   - 1-2 times a week   - 3-4 times a week   - 5-6 times a week   - 1 time a day   - twice a day   - 3 times a day   - 4-5 times a day   - more frequent than 5 times a day   **Non-alcoholic beer**  11a. When you drink non-alcoholic beer, how much do you drink, most often? *  *Choose only one option*   - - ½ glass (or less)   - 1 bottle (330 ml)   - 2 bottles   - 3 bottles   - 4 bottles (or more)   **Wine**  12. In the last 4 weeks, how many times have you drunk wine, sparkling wine or fruit wine? *  *Choose only one option*   - - Never   - 1 time a month   - 2-3 times a month   - 1-2 times a week   - 3-4 times a week   - 5-6 times a week   - 1 time a day   - twice a day   - 3 times a day   - 4-5 times a day   - less than 5 times a day   **Wine**  12a. When you drink wine, how much do you drink, the most frequent? *  *Choose only one option*   - - 1 glass (125 ml)   - 2 glasses   - 3 glasses   - 4 glasses   - 5 glasses (or more)   **Mixed cocktails or alcoholic beverages**  13. In the last 4 weeks, how many times have you had cocktails or other mixed alcoholic beverages? *  *Choose only one option*   - - Never   - 1 time a month   - 2-3 times a month   - 1-2 times a week   - 3-4 times a week   - 5-6 times a week   - 1 time a day   - twice a day   - 3 times a day   - 4-5 times a day   - more frequent than 5 times a day   **Mixed cocktails or alcoholic beverages**  13a. When you drink cocktails, how much do you drink, most often? *  *Choose only one option*   - - ½ drink (or less)   - 1 drink   - 2 drinks   - 3 drinks   - 4 drinks (or more)   **Strong alcoholic beverages**  14. In the last 4 weeks, how often have you drunk alcoholic beverages with high alcohol content (eg: rum, cognac, liqueur, vodka, brandy)? *  *Choose only one option*   - - Never   - 1 time a month   - 2-3 times a month   - 1-2 times a week   - 3-4 times a week   - 5-6 times a week   - 1 time a day   - 2 times a day   - 3 times a day   - 4-5 times a day   - more frequent than 5 times a day   **Strong alcoholic beverages**  14a. When you consume strength, how much do you drink, most often? *  *Choose only one option*   - - 1/2 cup   - 1 glass (20 ml)   - 2 glasses   - 3 glasses   - 4 glasses (or more)   **Sweet cereals**  15. In the last 4 weeks, how many times have you eaten sweet cereals for breakfast (including cornflakes, Fitness, ....)? *  *Choose only one option*   - - Never   - 1 time a month   - 2- 3 times per month   - 1-2 times a week   - 3-4 times a week   - 5-6 times a week   - 1 time a day   - twice a day   - 3 times a day   - 4-5 times a day   - more frequent than 5 times a day   **Sweet cereals**  15a. When you eat sweet cereals, how much do you eat most often? Please do not include milk. *  *Choose only one option*   - - ¼ bowl (or less)   - ½ bowl   - 1 bowl (125 ml)   - 2 bowls   - 3 bowls (or more)   **Musli**  16. In the last 4 weeks, how many times have you consumed musli? *  *Choose only one option*   - - Never   - 1 time a month   - 2-3 times a month   - 1-2 times a week   - 3-4 times a week   - 5-6 times a week   - 1 time a day   - twice a day   - 3 times a day   - 4-5 times a day   - more often than 5 times a day   **Musli**  16a. When you eat musli, how much do you eat, most often? Please do not include milk. *  *Choose a clear option*   - - ¼ bowl (or less)   - ½ bowl   - 1 bowl (125 ml)   - 2 bowls   - 3 bowls (or more)   **Wholemeal bread**  17. In the last 4 weeks, how often have you eaten wholemeal bread ? *  *Choose only one option*   - - Never   - 1 time a month   - 2-3 times a month   - 1-2 times a week   - 3-4 times a week   - 5-6 times a week   - 1 time a day   - twice a day   - 3 times a day   - 4-5 times a day   - more often than 5 times a day   **Wholemeal bread**  17a. When you eat wholemeal bread, how much do you eat, the most frequent? *  *Choose only one option*   - - ½ slice or ½ bun (or less)   - 1 slice or 1 bun   - 2 slices or 2 buns   - 3 slices or 3 buns   - 4 slices (or more)   **Brown bread or rye bread**  18. In the last 4 weeks, how many times have you eaten brown bread or rye bread? *  *Choose only one option*   - - Never   - 1 time a month   - 2-3 times a month   - 1-2 times a week   - d e 3-4 times a week   - 5-6 times a week   - 1 time a day   - twice a day   - 3 times a day   - 4-5 times a day   - more frequent than 5 times a day   **Brown bread or rye bread**  18a. When you eat brown bread or rye bread, how much do you eat, most often? *  *Choose only one option*   - - ½ slice or ½ bun (or less)   - 1 slice or 1 bun   - 2 slices or 2 buns   - 3 slices or 3 buns   - 4 slices (or more)   **White bread**  19. In the last 4 weeks, how many times have you eaten white bread (including bread without yeast)? *  *Choose only one option*   - - Never   - 1 time a month   - 2-3 times a month   - 1-2 times a week   - 3-4 times a week   - 5-6 times a week   - 1 time a day   - twice a day   - 3 times a day   - 4-5 times a day   - more frequent than 5 times a day   **White bread**  19a. When you eat white bread, how much do you eat, most often? *  *Choose only one option*   - - ½ slice or ½ bun (or less)   - 1 slice or 1 bun   - 2 slices or 2 buns   - 3 slices or 3 buns   - 4 slices (or more)   **Butter or margarine**  20. In the last 4 weeks, how many times have you consumed butter or margarine? *  *Choose only one option*   - - Never   - 1 time a month   - 2-3 times a month   - 1-2 times a week   - 3-4 times a week   - 5-6 times a week   - 1 time a day   - twice a day   - 3 times a day   - 4-5 times a day   - more frequent than 5 times a day   **Butter or margarine**  20a. When you eat butter or margarine, how much do you eat most often? *  *Choose only one option*   - - ½ teaspoon (or less)   - 1 teaspoon (race)   - 2 teaspoons   - 3 tbsp (grated)   - 4 teaspoons (or more)   **Cream cheese / Spreadable cheese**  21. In the last 4 weeks, how many times have you consumed spreadable cheese (Philadelphia, Almette)? *  *Choose only one option*   - - Never   - 1 time a month   - 2-3 times a month   - 1-2 times a week   - 3-4 times a week   - 5-6 times a week   - 1 time a day   - twice a day   - 3 times a day   - 4-5 times a day   - more frequent than 5 times a day   **Cream cheese / Spreadable cheese**  21a. When you eat cream cheese, how much do you eat, most often? *  *Choose only one option*   - - ½ spoon (or less)   - 1 tablespoon   - 2 tablespoons   - 3 tablespoons   - 4 tablespoons (or more)   21b. Do you usually eat low-fat cream? *  *Choose only one option*   - - Rarely or never   - Almost half of you get out of situations   - Predominant   - I do not know   **Cheese**  22. In the last 4 weeks, how many times have you added cheese (telemea, cheese, mozzarella)? Fresh soft cheese is not accounted here. *  *Choose only one option*   - - Never   - 1 time a month   - 2-3 times a month   - 1-2 times a week   - 3-4 times a week   - 5-6 times a week   - 1 time a day   - twice a day   - 3 times a day   - 4-5 times a day   - more frequent than 5 times a day   **Cheese**  22a. When consumed cheeses (cottage cheese, cheese, mozzarella), how much do you eat, most often? *  *Choose only one option*   - - ½ slice or ½ portion (or less)   - 1 slice or 1 portion   - 2 slices or 2 servings   - 3 slices or 3 servings   - 4 slices or 4 servings (or more)   22b. Do you usually eat skim cheese? *  *Choose only one option*   - - Rarely or never   - In almost half of the situations   - Predominant   - I do not know   **Fermented dairy products**  23. In the last 4 weeks, how many times have you consumed yogurt, kefir, whipped milk, fresh soft cheese? *  *Choose only one option*   - - Never   - 1 time a month   - 2-3 times a month   - 1-2 times a week   - 3-4 times a week   - 5-6 times a week   - 1 time a day   - twice a day   - 3 times a day   - 4-5 times a day   - more frequent than 5 times a day   **Fermented dairy products**  23a. When consumed fermented dairy products, how much you eat most often? *  *Choose only one option*   - - ½ glass (or less)   - 1 glass (200 g)   - 2 glasses   - 3 glasses   - 4 glasses   23b. Do you usually eat low-fat fermented milk? *  *Choose only one option*   - - Rarely or never   - Almost half of the situations   - Predominant   - I do not know   **Honey / jam / marmalade / syrup**  24. In the last 4 weeks, how many times have you consumed honey or jams / marmalade /syrup? *  *Choose only one option*   - - Never   - 1 time a month   - 2-3 times a month   - 1-2 times a week   - 3-4 times a week   - 5-6 times a week   - 1 time a day   - twice a day   - 3 times a day   - 4-5 times a day   - more frequent than 5 times a day   **Honey / jam / marmalade / syrup**  24a. When you consume honey or jam how much do you eat, most often? *  *Choose only one option*   - - 1 teaspoon or less   - 2 teaspoons (with tip)   - 3 teaspoons (with tip)   - 4 teaspoons (with tip)   - 5 teaspoons (or more)   **Chocolate cream**  25. In the last 4 weeks, how many times have you consumed spreadable chocolate cream (Nutella, Finetti)? *  *Choose one option is*   - - Never   - 1 time a month   - 2-3 times a month   - 1-2 times a week   - 3-4 times a week   - 5-6 times a week   - 1 time a day   - twice a day   - 3 times a day   - d is 4-5 times a day   - more frequent than 5 times a day   **Chocolate cream**  25a. When you consume chocolate cream, how much do you eat most often? *  *Choose only one option*   - - 1 teaspoon or less   - 2 teaspoons topped   - 3 teaspoons topped   - 4 tablespoons topped   - 5 teaspoons (or more)   **Eggs**  26. In the last 4 weeks, how often have you eaten eggs (eg fried eggs, fried eggs, scrambled eggs, boiled eggs)? *  *Choose only one option*   - - Never   - 1 time a month   - 2-3 times a month   - 1-2 times a week dig   - 3-4 times a week   - 5-6 times a week   - 1 time a day   - twice a day   - 3 times a day   - 4- 5 times a day   - more frequent than 5 times a day   **Eggs**  26a. When you eat eggs how many do you eat, most often? *  *Choose only one option*   - - ½ egg (or less)   - 1 or   - 2 eggs   - 3 eggs   - 4 eggs (or more)   **Poultry**  27. In the last 4 weeks, how many times have you eaten poultry? *  *Choose only one option*   - - Never   - 1 time a month   - 2-3 times a month   - 1-2 times a week   - 3-4 times a week   - 5-6 hours a week   - 1 time a day   - twice a day   - 3 times a day   - 4-5 times a day   - more frequent than 5 times a day   **Poultry**  27a. When you eat poultry how much do you eat, most often? One serving means about 1 chicken leg or 8 nuggets. *  *Choose only one option*   - - ¼ portion (or less)   - ½ portion   - 1 serving   - 2 servings   - 3 servings (or more)   27b. How often do you eat breaded or fried poultry (including in fryer)? *  *Choose only one option*   - - Almost never   - Approximately ¼ of occasions   - About half of occasions   - About ¾ of occasions   - Almost every time   **Fast food**  28. In the last 4 weeks, how many times have you eaten fast food: burgers, kebab, shawarma or plescavita? *  *Choose* *only one option*   - - Never   - 1 time a month   - 2-3 times a month   - 1-2 times a week   - 3-4 times a week   - 5-6 times a week   - 1 time a day   - twice a day   - 3 times a day   - 4-5 times a day   - more frequent than 5 times a day   **Fast food**  28a. When you eat fast food, how much do you eat, most often? *  *Choose only one option*   - - ½ pcs (or less)   - 1 piece   - 2 pieces   - 3 pieces   - 4 pieces (or more)   **Sausages / hot-dog / frankfurter**  29. In the last 4 weeks, how many times have you eaten Sausages / hot-dog / frankfurter? *  *Choose only one option*   - - Never   - 1 time a month   - 2-3 times a month   - 1-2 times a week   - 3-4 times a week   - 5-6 times a week   - 1 time a day   - 2 times a day   - 3 times a day   - 4-5 times a day   - more frequent than 5 times a day   **Sausages / hot-dog / frankfurter**  29a. When you eat sausages / hot-dog / frankfurter, how much do you eat, most often? *  *Choose only one option*   - - ½ pcs (or less)   - 1 piece   - 2 pieces   - 3 pieces   - 4 pieces (or more)   **Red meat**  30. In the last 4 weeks, how often have you eaten meat (eg pork, beef, venison)? Sausages and poultry do not enter here. *  *Choose only one option*   - - Never   - 1 yes per month   - 2-3 times a month   - 1-2 times a week   - 3-4 times a week   - 5-6 times a week   - 1 time a day   - twice a day   - 3 times a day   - 4-5 times a day   - more frequent than 5 times a day   **Red meat**  30a. When you eat red meat, how much do you eat, most often? "A portion" means 1 slice of chop, 1 slice of steak, 1 slice as big as a palm *  *Choose only one option*   - - ¼ portion (or less)   - ½ portion   - 1 portion   - 2 portions   - 3 portions (or more)   30b. How often has meat been breaded (e.g. schnitzel)? *  *Choose only one option*   - - Almost never   - Approximately at ¼ of intake   - About half of intake   - Approximately ¾ of intake   - Almost every time   **Salami**  31. In the last 4 weeks hands, how often have you eaten salami (including caltabosh, blood sausage). Ham doesn't come in here. *  *Choose only one option*   - - Never   - 1 time a month   - 2-3 times a month   - 1-2 times a week   - 3-4 times a week   - 5-6 times a week   - 1 time a day   - twice a day   - 3 times a day   - 4-5 times a day   - more often than 5 times a day   **Salami**  31a. When you eat salami (including caltabosh, blood sausage), how much do you eat, most often? *  *Choose only one option*   - - ½ slice   - 1 slice   - 2 slices   - 3 slices   - 4 slices or more   31b. Do you choose to eat low-fat salami (including caltabosh, blood sausages, drums, pies)? *  *Choose only one option*   - - rarely or never   - almost half of consumption   - predominant   - St. no space   **Ham**  32. In the last 4 weeks, how often have you eaten ham? *  *Choose only one option*   - - Never   - 1 time a month   - 2-3 times a month   - 1-2 times a week   - 3-4 times a week   - 5-6 times a week   - 1 time a day   - twice a day   - 3 times a day   - 4-5 times a day   - more frequent than 5 times a day   **Ham**  32a. When you eat ham, how much do you eat, most often? *  *Choose only one option*   - - ½ slice   - 1 slice   - 2 slices   - 3 slices   - 4 slices or more   **Canned fish, marinated / smoked fish**  33. In the last 4 weeks, how often have you eaten canned fish, marinated or smoked fish (eg smoked salmon, smoked mackerel, canned tuna)? *  *Choose only one option*   - - Never   - 1 time a month   - 2-3 times a month   - 1-2 times a week   - 3-4 times a week   - 5-6 times a week   - 1 time a day   - twice a day   - 3 times a day   - 4-5 times a day   - more frequent than 5 times a day   **Canned fish, marinated / smoked fish**  33a. When you eat canned fish, marinated or smoked fish, how much do you eat, most often? By a portion is meant a quantity that would cover a slice of bread. *  *Choose only one option*   - - ¼ portion (or less)   - ½ portion   - 1 serving   - 2 servings   - 3 servings (or more)   **Cooked fish**  34. In the last 4 weeks, how often have you eaten cooked fish as a main course (eg salmon, trout)? *  *Choose the bone around option*   - - Never   - 1 time a month   - 2-3 times a month   - 1-2 times a week   - 3-4 times a week   - 5-6 times a week   - 1 time a day   - twice a day   - 3 times a day   - 4-5 times a day   - more frequent than 5 times a day   **Cooked fish**  34a. When you eat cooked fish, as a main course, how much do you eat, most often? * A portion means a quantity of 1 fish fillet or a commercially available fish stick. *  *Choose only one option*   - - ¼ portion or less   - ½ portion   - 1 serving   - 2 servings   - 3 servings or more   34b. How often was the fish cooked pané or fried? *  *Choose only one option*   - - Almost never   - About ¼ of intake   - About half of the intake   - About ¾ of intake   - Almost everytime   **Fresh fruits**  35. In the last 4 weeks, how often have you eaten fresh fruit (eg apples, bananas, cherries, peaches)? *  *Choose only one option*   - - Never   - 1 time a month   - 2-3 times a month   - 1-2 times a week   - 3-4 times a week   - 5-6 times a week   - 1 time a day   - twice a day   - 3 times a day   - 4-5 times a day   - less than 5 times a day   **Fresh fruits**  35a. When you eat fresh fruit, how much do you eat, most often? * 1 piece is, for example, 1 apple or 1 banana. The bowl is a small, dessert bowl, 150ml, for example with strawberries or cherries. *  *Choose only one option*   - - ½ piece or ½ bowl or less   - 1 piece or 1 bowl   - 2 pieces or 2 bowls   - 3 pieces or 3 bowls   - 4 bowls or 4 bowls or more   **Compote or canned fruit**  36. In the last 4 weeks, how often have you eaten boiled fruit (for example, compote or canned fruit) *  *Choose only one option*   - - Never   - 1 time a month   - 2-3 times a month   - 1-2 times a week   - 3-4 times a week   - 5-6 times a week   - 1 time a day   - twice a day   - 3 times a day   - 4-5 times a day   - more often 5 times a day   **Compote or canned fruit**  36a. When you eat boiled fruit, how much do you eat, most often? * This is a small dessert bowl of 150ml *  *Choose only one option*   - - ¼ bowl (or less)   - ½ bowl   - 1 bowl   - 2 bowls   - 3 bowls (or more)   **Raw vegetables**  37. In the last 4 weeks, how often have you eaten raw vegetables (eg lettuce, vegetables, etc.) *  *Choose only one option*   - - Never   - 1 time a month   - 2-3 times a month   - 1-2 times a week   - 3-4 times a week   - d e 5-6 times a week   - 1 time a day   - twice a day   - 3 times a day   - 4-5 times a day   - more frequent than 5 times a day   **Raw vegetables**  37a. When you eat raw vegetables, how much do you eat most often? * One serving is as much as we can hold in the cup of two hands or as much as it covers the middle of a flat plate *  *Choose only one option*   - - ¼ serving or less   - ½ serving   - 1 serving   - 2 servings   - 3 servings s have more   **Dried legumes**  38. In the last 4 weeks, how often have you eaten dried legumes (eg beans, peas , lentils)? *  *Choose only one option*   - - Never   - 1 time a month   - 2-3 times a month   - 1-2 times a week   - 3-4 times per week Aman   - 5-6 times a week   - 1 time a day   - twice a day   - 3 times a day   - 4-5 times a day   - more frequent than 5 times a day   **Dried legumes**  38a. When you eat dried legumes (beans, peas, lentils), how much do you eat most often? * One serving means half a plate *  *Choose only one option*   - - ¼ portion or less   - ½ portion   - 1 serving   - 2 servings   - 3 servings or more   **Boiled / cooked vegetables**  39. In the last 4 weeks, how often have you eaten boiled / cooked vegetables? *  *Choose one option is*   - - Never   - 1 time a month   - 2-3 times a month   - 1-2 times a week   - 3-4 times a week   - 5-6 times a week   - 1 time a day   - twice a day   - 3 times a day   - 4-5 times a day   - more frequent than 5 times a day   **Boiled / cooked vegetables**  39a. When you eat boiled / cooked vegetables, how much do you eat, most often? * One serving is half a plate *  *Choose only one option*   - - ¼ portion or less   - ½ portion   - 1 serving   - 2 servings   - 3 servings or more   39b. When you eat cooked / cooked vegetables, they were usually: *  *Choose only one option*   - - fresh vegetables   - frozen vegetables   - canned vegetables   - I do not know   **Pasta**  40. In the last 4 weeks, how often have you eaten pasta (eg spaghetti, macaroni, lasagna, ravioli, noodles, dumplings)? *  *Choose only one option*   - - Never   - 1 time a month   - 2-3 times a month   - 1-2 times a week   - 3-4 times a week   - 5-6 times a week   - 1 time a day   - twice a day   - 3 times a day   - 4-5 times a day   - more frequent than 5 times a day   **Pasta**  40a. When you eat pasta, how much do you eat, most often? *  *Choose only one option*   - - ¼ plate or less related   - ½ plate   - 1 plate   - 2 plates   - 3 plates or more   **Rice**  41. In the last 4 weeks, how often have you eaten rice (couscous, bulgur wheat, barley come in here)? *  *Choose only one option*   - - Never   - 1 time a month   - 2-3 times a month   - 1-2 times a week   - 3-4 times a week   - 5-6 times a week   - 1 time a day   - twice a day   - 3 times a day   - 4-5 times a day   - more frequent than 5 times a day   **Rice**  41a. When you eat rice (or couscous, bulgur wheat, barley), how much do you eat, most often? *  *Choose only one option*   - - ¼ portion or less   - ½ portion   - 1 serving   - 2 servings   - 3 servings or more   **Boiled potatoes**  42. In the last 4 weeks, how often have you eaten boiled potatoes? *  *Choose only one option*   - - Never   - 1 time a month   - 2-3 times a month   - 1-2 times a week   - 3-4 times a week   - 5-6 times a week   - 1 time a day   - twice a day   - 3 times a day   - 4-5 times a day   - more often 5 times a day   **Boiled potatoes**  42a. When you eat boiled potatoes, how much do you eat most often? * We refer to medium-sized potatoes *  *Choose only one option*   - - ½ serving or 1 potato, or less   - 1 serving or 2 potatoes   - 1 ½ portion or 3 potatoes   - 2 servings or 4 potatoes   - 2 ½ servings or 5 potatoes or more   **Fried** **specialties from potatoes**  43. In the last 4 weeks, how often have you eaten specialty fried specialties from potatoes (for example, croquettes or potato pancakes)? French fries do not come in here. *  *Choose only one option*   - - Never   - 1 time a month   - 2-3 times a month   - 1-2 times a week   - 3-4 times a week   - 5-6 times a week   - 1 day a day   - twice a day   - 3 times a day   - 4-5 times a day   - more frequent than 5 times a day   **Fried specialties from potatoes**  43a. When you eat fried potato specialties (for example, croquettes or potato pancakes), how much do you eat most often? *  *Choose only one option*   - - ¼ plate or 2 croquettes, or less   - ½ plates or 4 croquettes   - 1 plate or 8 croquettes   - 2 plates   - 3 plates or more   **Fries**  44. In the last 4 weeks, how often have you eaten French fries? *  *Choose only one option*   - - Never   - 1 time a month   - 2-3 times a month   - 1-2 times a week   - 3-4 times a week   - 5-6 times a week   - 1 time a day   - twice a day   - 3 times a day   - 4-5 times a day   - more frequent than 5 times a day   **Fries**  44a. When you eat French fries, how much do you eat, most often? * One serving means an average portion of fast food or as much as fits in two hands. *  *Choose only one option*   - - ¼ portion or less   - ½ portion   - 1 serving   - 2 servings   - 3 servings or more   **Pizza**  45. In the last 4 weeks, how often have you eaten pizza? *  *Choose only one option*   - - Never   - 1 time a month   - 2-3 times a month   - 1-2 times a week   - 3-4 times a week   - 5-6 times a week   - 1 time a day   - twice a day   - of 3 times a day   - 4-5 times a day   - more frequent than 5 times a day   **Pizza**  * One serving is the size of a 350g frozen pizza  45a. When you eat pizza, how much do you eat, most often? *  *Choose only one option*   - - ¼ portion or less   - ½ portion   - 1 serving   - 2 servings   - 3 servings or more   **Pastries**  46. ​​In the last 4 weeks of the week, how often have you eaten cake, cakes, pastries (including muffins, apple cakes, baklava)? *  *Choose only one option*   - - Never   - 1 time a month   - 2-3 times a month   - 1-2 times a week   - 3-4 times a week   - 5-6 times a week   - 1 time a day   - twice a day   - 3 times a day   - 4-5 times a day   - more frequent than 5 times a day   **Pastries**  46a. When you eat cake, cakes, sweet pastries, how much do you eat, how often? *  *Choose only one option*   - - ½ piece or less   - 1 piece   - 2 pieces   - 3 pieces   - 4 pieces or more   **Biscuits**  47. In the last 4 weeks, how often have you eaten biscuits (eg butter biscuits, cookies, cookies)? *  *Choose a single hate option*   - - Never   - 1 time a month   - from 2-3 times per month   - 1-2 times a week   - 3-4 times a week   - 5-6 times a week   - 1 time a day   - twice a day   - 3 times a day   - 4-5 times a day   - more frequent than 5 times a day   **Biscuits**  47a. When you eat biscuits, how much do you eat, most often? *  *Choose only one option*   - - 2 biscuits or less   - 3 biscuits   - 4 biscuits   - 5 biscuits   - 6 biscuits or more   **Chocolate**  48. In the last 4 weeks, how often have you eaten chocolate (including chocolate bars, chocolates)? *  *Choose only one option*   - - Never   - 1 time a month   - 2-3 times a month   - 1-2 times a week   - 3-4 times a week   - 5-6 times a week   - 1 time a day   - twice a day   - 3 times a day   - 4-5 times a day   - more frequent than 5 times a day   **Chocolate**  48a. When you eat chocolate, how much do you eat, most often? * A chocolate bar is a standard 100g. A small stick is a Kinder type stick. A large stick is a Mars type. *  *Choose only one option*   - - ½ chocolate bar or less   - ¼ chocolate bar or 1 small chocolate stick   - ½ chocolate bar or 1 large chocolate stick   - 1 chocolate bar or 2 large chocolate sticks   - 2 chocolate bar or more   **Sweets**  49. In the last 4 weeks, how often have you eaten sweets such as candies, jellies, Turkish delight, cough candy? *  *Choose only one option*   - - Never   - 1 time a month   - 2-3 times a month   - 1-2 times a week   - 3-4 times a week   - 5-6 times a week   - 1 time a day   - twice a day   - 3 times a day   - 4-5 times a day   - less than 5 times a day   **Sweets**  49a. When you eat sweets like candy, jellies, Turkish delight, cough candy, how much do you eat, most often? *  *Choose only one option*   - - 1 piece   - 2-5 pieces   - 6-10 pieces   - 11-20 pieces   - 21 pieces or more   **Ice cream**  50. In the last 4 weeks, how often have you eaten ice cream? *  *Choose only one option*   - - Never   - 1 time a month   - 2-3 times a month   - 1-2 times a week   - 3-4 times a week   - 5-6 times a week   - 1 time a day   - twice a day   - of 3 times a day   - from 4-5 times per day   - more frequent than 5 times a day   **Ice cream**  50a. When you eat ice cream, how much do you eat, most often? *  *Choose only one option*   - - ½ cup or less   - 1 cup   - 2 cups or 1 ice cream per stick   - 3 cups   - 4 cups or more   **Chips**  51. In the last 4 weeks, how often have you eaten potato chips? *  *Choose only one option*   - - Never   - 1 time a month   - 2-3 times a month   - 1-2 times a week   - 3-4 times a week   - 5-6 times a week   - 1 time a day   - twice a day   - 3 times a day   - 4-5 times a day   - more frequent than 5 times a day   **Chips**  51a. When you eat potato chips, how much do you eat, most often? * This is a small dessert bowl of 150ml *  *Choose only one option*   - - ¼ bowl (or less)   - ½ bowl   - 1 bowl   - 2 bowls   - 3 bowls (to u more)   **Salads / pretzels**  52. In the last 4 weeks, how often have you eaten saltines, pretzels, sticks, salads? *  *Choose only one option*   - - Never   - 1 time a month   - 2-3 times a month   - 1-2 times a week   - 3-4 times to PTA hand   - 5-6 times a week   - 1 time a day   - twice a day   - 3 times a day   - 4-5 times a day   - more frequent than 5 times a day   **Salads / pretzels**  52a. When you eat pickles, pretzels, sticks, salads, how much do you eat, most often? *  *Choose a clear option*   - - ¼ bowl (or less)   - ½ bowl   - 1 bowl   - 2 bowls   - 3 bowls (or more)   **Walnuts / hazelnuts**  53. How often have you eaten nuts in the last 4 weeks (eg walnuts, almonds, hazelnuts, peanuts, pistachios, Brazil nuts, etc.)? *  *Choose only one option*   - - Never   - 1 time a month   - 2-3 times a month   - 1-2 times a week   - 3-4 times a week   - 5-6 times a week   - 1 time a day   - twice a day   - 3 times a day   - 4-5 times a day   - more frequent than 5 times a day   **Walnuts / hazelnuts**  53a. When you eat nuts, how much you eat, most often? * A portion is about as much as we can hold in one hand *  *Select a single option*   - - ¼ portion or less   - ½ portion   - 1 serving   - 2 servings   - 3 servings or more   **Food preparation**  54. What kind of fat are you using most often to prepare meat and fish? *  *Choose only one option*   - - butter, margarine   - olive oil   - vegetable cooking fats (palm butter, coconut butter)   - cooking animal fats (lard)   - sunflower oil, corn germ oil, rapeseed oil, etc.   - I do not know   55. What kind of fat do you usually use to prepare vegetables? *  *Choose only one option*   - - butter, margarine   - olive oil   - vegetable cooking fats (palm butter, coconut butter)   - cooking animal fats (lard)   - sunflower oil, corn germ oil, rapeseed oil, etc.   - I do not know   - I don't use it at all   56. Do you usually eat vegetarian? *  *Choose only one option*   - - No   - Yes   **Food preparation**  56a. Which of the following foods do you avoid eating? Multiple answers apply.  *Check all the correct options*   - - red meat, poultry and sausages   - over   - milk and dairy products   - eggs   **Food preparation**  57. How many times a week do you prepare a hot meal (lunch or dinner) from basic ingredients / fresh raw materials? *  *Choose only one option*   - - daily   - 5-6 times a week   - 3-4 times a week   - 1-2 times a week   - never | **Lapte**  1. În ultimele 4 săptămâni, de câte ori ați consumat lapte (inclusiv lapte pentru cafea, cereale) ? *  *Alegeți o singura opțiune*   - - Niciodată   - 1 dată pe lună   - de 2-3 ori pe lună   - de 1-2 ori pe săptămână   - de 3-4 ori pe săptămână   - de 5-6 ori pe săptămână   - 1 dată pe zi   - de 2 ori pe zi   - de 3 ori pe zi   - de 4-5 ori pe zi   - mai frecvent de 5 ori pe zi   **Lapte**  1a. Când consumați lapte, cât de mult beți, cel mai frecvent? *  *Alegeți o singura opțiune*   - - ½ Pahar (sau mai puțin)   - 1 Pahar (200 ml)   - 2 Pahare   - 3 Pahare   - 4 Pahare (sau mai mult)   1b. Ce tip de lapte consumați cel mai frecvent? *  *Alegeți o singura opțiune*   - - Lapte integral (cel puțin 3,5% grăsime)   - Lapte cu conținut scăzut de grăsime (1,5% grăsime)   - Lapte degresat (maximum 0,3% grăsime)   - Lapte de soia   - Lapte fără lactoză   - Alt tip   **Băuturi răcoritoare îndulcite cu zahăr**  2. De câte ori ați consumat băuturi răcoritoare îndulcite cu zahăr (de ex. Cola, limonadă, băuturi răcoritoare pe bază de ceai, bere de malț, băuturi energizante) în ultimele 4 săptămâni? Vă rugăm să NU includeți băuturile light sau fără zahăr *  *Alegeți o singura opțiune*   - - Niciodată   - 1 dată pe lună   - de 2-3 ori pe lună   - de 3-4 ori pe săptămână   - de 5-6 ori pe săptămână   - 1 dată pe zi   - de 2 ori pe zi   - de 3 ori pe zi   - de 4-5 ori pe zi   - mai frecvent de 5 ori pe zi   **Băuturi răcoritoare îndulcite cu zahăr**  2a. Când consumați băuturi răcoritoare îndulcite cu zahăr cât de mult beți, cel mai frecvent? *  *Alegeți o singura opțiune*   - - ½ Pahar (sau mai puțin)   - 1 Pahar (200 ml)   - 2 Pahare   - 3 Pahare   - 4 Pahare (sau mai mult)   **Băuturi răcoritoare light**  3. În ultimele 4 săptămâni, de câte ori ați consumat băuturi răcoritoare cu conținut scăzut de calorii (de exemplu băuturi răcoritoare light)? *  *Alegeți o singura opțiune*   - - Niciodată   - 1 dată pe lună   - de 2-3 ori pe lună   - de 1-2 ori pe săptămână   - de 3-4 ori pe săptămână   - de 5-6 ori pe săptămână   - 1 dată pe zi   - de 2 ori pe zi   - de 3 ori pe zi   - de 4-5 ori pe zi   - mai frecvent de 5 ori pe zi   **Băuturi răcoritoare light**  3a. Când consumați băuturi răcoritoare light cât de mult beți, cel mai frecvent? *  *Alegeți o singura opțiune*   - - ½ Pahar (sau mai puțin)   - 1 Pahar (200 ml)   - 2 Pahare   - 3 Pahare   - 4 Pahare (sau mai mult)   **Suc de fructe**  4. În ultimele 4 săptămâni, de câte ori ați consumat suc de fructe (de exemplu, de portocale, de mere, suc de cireșe)? Se consideră, de asemenea și sucul de fructe diluat. *  *Alegeți o singura opțiune*   - - Niciodată   - 1 dată pe lună   - de 2-3 ori pe lună   - de 1-2 ori pe săptămână   - de 3-4 ori pe săptămână   - de 5-6 ori pe săptămână   - 1 dată pe zi   - de 2 ori pe zi   - de 3 ori pe zi   - de 4-5 ori pe zi   - mai frecvent de 5 ori pe zi   **Suc de fructe**  4a. Când consumați suc de fructe cât de mult beți, cel mai frecvent? *  *Alegeți o singura opțiune*   - - ½ Pahar (sau mai puțin)   - 1 Pahar (200 ml)   - 2 Pahare   - 3 Pahare   - 4 Pahare (sau mai mult)   4b. Cum consumați sucul de obicei? *  *Alegeți o singura opțiune*   - - Nediluat   - Aproximativ ¼ suc și ¾ apă   - Aproximativ suc ½ și ½ apă   - Aproximativ ¾ suc și ¼ apă   **Suc de legume**  5. În ultimele 4 săptămâni, de câte ori ați consumat suc de legume (de exemplu suc de roșii sau suc de morcovi)? Se consideră de asemenea, și sucul de legume diluat. *  *Alegeți o singura opțiune*   - - Niciodată   - 1 dată pe lună   - de 2-3 ori pe lună   - de 1-2 ori pe săptămână   - de 3-4 ori pe săptămână   - de 5-6 ori pe săptămână   - 1 dată pe zi   - de 2 ori pe zi   - de 3 ori pe zi   - de 4-5 ori pe zi   - mai frecvent de 5 ori pe zi   **Suc de legume**  5a. Când consumați suc de legume cât de mult beți, cel mai frecvent? *  *Alegeți o singura opțiune*   - - ½ Pahar (sau mai puțin)   - 1 Pahar (200 ml)   - 2 Pahare   - 3 Pahare   - 4 Pahare (sau mai mult)   5b. Cum consumați sucul de obicei? *  *Alegeți o singura opțiune*   - - Nediluat   - Aproximativ ¼ suc și ¾ apă   - Aproximativ suc ½ și ½ apă   - Aproximativ ¾ suc și ¼ apă   **Apă**  6. În ultimele 4 săptămâni, de câte ori ați consumat apă (apă de la robinet, apă plată, apă de foraj, apă minerală, apă aromatizată)? *  *Alegeți o singura opțiune*   - - Niciodată   - 1 dată pe lună   - de 2-3 ori pe lună   - de 1-2 ori pe săptămână   - de 3-4 ori pe săptămână   - de 5-6 ori pe săptămână   - 1 dată pe zi   - de 2 ori pe zi   - de 3 ori pe zi   - de 4-5 ori pe zi   - mai frecvent de 5 ori pe zi   **Apă**  6a. Când consumați apă cât de mult beți, cel mai frecvent? *  *Alegeți o singura opțiune*   - - ½ Pahar (sau mai puțin)   - 1 Pahar (200 ml)   - 2 Pahare   - 3 Pahare   - 4 Pahare (sau mai mult)   **Ceaiuri de fructe și de plante**  7. În ultimele 4 săptămâni, de câte ori ați consumat ceai de fructe sau ceai pe bază de plante? *  *Alegeți o singura opțiune*   - - Niciodată   - 1 dată pe lună   - de 2-3 ori pe lună   - de 1-2 ori pe săptămână   - de 3-4 ori pe săptămână   - de 5-6 ori pe săptămână   - 1 dată pe zi   - de 2 ori pe zi   - de 3 ori pe zi   - de 4-5 ori pe zi   - mai frecvent de 5 ori pe zi   **Ceai de fructe sau ceai pe bază de plante**  7a. Când consumați ceai de fructe sau plante cât de mult beți, cel mai frecvent? *  *Alegeți o singura opțiune*   - - ½ Ceașcă (sau mai puțin)   - 1 Ceașcă (200 ml)   - 2 Cești   - 3 Cești   - 4 Cești (sau mai mult)   7b. Obișnuiți să îndulciți ceaiul cu zahăr? Nu ne referim la utilizarea îndulcitorilor cu conținut redus de calorii. *  *Alegeți o singura opțiune*   - - Nu   - Da, aproximativ 1 linguriță la o ceașcă   - Da, 2 lingurițe la o ceașcă   - Da, 3 lingurițe (sau mai mult) la o ceașcă   **Ceai negru sau verde**  8. În ultimele 4 săptămâni, de câte ori ați băut ceai negru sau verde? *  *Alegeți o singura opțiune*   - - Niciodată   - 1 dată pe lună   - de 2-3 ori pe lună   - de 1-2 ori pe săptămână   - de 3-4 ori pe săptămână   - de 5-6 ori pe săptămână   - 1 dată pe zi   - de 2 ori pe zi   - de 3 ori pe zi   - de 4-5 ori pe zi   - mai frecvent de 5 ori pe zi   **Ceai verde sau negru**  8a. Când consumați ceai verde sau negru cât de mult beți, cel mai frecvent? *  *Alegeți o singura opțiune*   - - ½ Ceașcă (sau mai puțin)   - 1 Ceașcă (200 ml)   - 2 Cești   - 3 Cești   - 4 Cești (sau mai mult)   8b. Obișnuiți să îndulciți ceaiul cu zahăr? Nu ne referim la utilizarea îndulcitorilor cu conținut redus de calorii. *  *Alegeți o singura opțiune*   - - Nu   - Da, aproximativ 1 linguriță la o ceașcă   - Da, 2 lingurițe la o ceașcă   - Da, 3 lingurițe (sau mai mult) la o ceașcă   **Cafea**  9. În ultimele 4 săptămâni, de câte ori ați consumat cafea (inclusiv cappuccino, latte macchiato, espresso)? *  *Alegeți o singura opțiune*   - - Niciodată   - 1 dată pe lună   - de 2-3 ori pe lună   - de 1-2 ori pe săptămână   - de 3-4 ori pe săptămână   - de 5-6 ori pe săptămână   - 1 dată pe zi   - de 2 ori pe zi   - de 3 ori pe zi   - de 4-5 ori pe zi   - mai frecvent de 5 ori pe zi   **Cafea**  9a. Când consumați cafea cât de mult beți, cel mai frecvent? *  *Alegeți o singura opțiune*   - - ½ Ceașcă (sau mai puțin)   - 1 Ceașcă (150 ml)   - 2 Cești   - 3 Cești   - 4 Cești (sau mai mult)   9b. Obișnuiți să îndulciți cafeaua cu zahăr? Nu ne referim la utilizarea îndulcitorilor cu conținut redus de calorii. *  *Alegeți o singura opțiune*   - - Nu   - Da, aproximativ 1 linguriță la o ceașcă   - Da, 2 lingurițe la o ceașcă   - Da, 3 lingurițe (sau mai mult) la o ceașcă   **Bere cu alcool**  10. În ultimele 4 săptămâni, cât de des ați băut bere (alcoolică)? *  *Alegeți o singura opțiune*   - - Niciodată   - 1 dată pe lună   - de 2-3 ori pe lună   - de 1-2 ori pe săptămână   - de 3-4 ori pe săptămână   - de 5-6 ori pe săptămână   - 1 dată pe zi   - de 2 ori pe zi   - de 3 ori pe zi   - de 4-5 ori pe zi   - mai frecvent de 5 ori pe zi   **Bere cu alcool**  10a.Când consumați bere cu alcool, cât de mult beți, cel mai frecvent? *  *Alegeți o singura opțiune*   - - ½ sticlă (sau mai puțin)   - 1 sticlă (500 ml)   - 2 sticle   - 3 sticle   - 4 sticle (sau mai mult)   **Bere fără alcool**  11. În ultimele 4 săptămâni, de câte ori ați băut bere fără alcool? *  *Alegeți o singura opțiune*   - - Niciodată   - 1 dată pe lună   - de 2-3 ori pe lună   - de 1-2 ori pe săptămână   - de 3-4 ori pe săptămână   - de 5-6 ori pe săptămână   - 1 dată pe zi   - de 2 ori pe zi   - de 3 ori pe zi   - de 4-5 ori pe zi   - mai frecvent de 5 ori pe zi   **Bere fără alcool**  11a. Când consumați bere fără alcool, cât de mult beți, cel mai frecvent? *  *Alegeți o singura opțiune*   - - ½ sticlă (sau mai puțin)   - 1 sticlă (330 ml)   - 2 sticle   - 3 sticle   - 4 sticle (sau mai mult)   **Vin**  12. În ultimele 4 săptămâni, de câte ori ați băut vin, vin spumant sau vin de fructe? *  *Alegeți o singura opțiune*   - - Niciodată   - 1 dată pe lună   - de 2-3 ori pe lună   - de 1-2 ori pe săptămână   - de 3-4 ori pe săptămână   - de 5-6 ori pe săptămână   - 1 dată pe zi   - de 2 ori pe zi   - de 3 ori pe zi   - de 4-5 ori pe zi   - mai frecvent de 5 ori pe zi   **Vin**  12a. Când consumați vin, cât de mult beți, cel mai frecvent? *  *Alegeți o singura opțiune*   - - 1 pahar (125 ml)   - 2 pahare   - 3 pahare   - 4 pahare   - 5 pahare (sau mai mult)   **Cocteiluri sau băuturi alcoolice mixte**  13. În ultimele 4 săptămâni, de câte ori ai avut cocteiluri sau alte băuturi alcoolice mixte? *  *Alegeți o singura opțiune*   - - Niciodată   - 1 dată pe lună   - de 2-3 ori pe lună   - de 1-2 ori pe săptămână   - de 3-4 ori pe săptămână   - de 5-6 ori pe săptămână   - 1 dată pe zi   - de 2 ori pe zi   - de 3 ori pe zi   - de 4-5 ori pe zi   - mai frecvent de 5 ori pe zi   **Coctailuri sau băuturi alcoolice mixte**  13a. Când consumați coctail, cât de mult beți, cel mai frecvent? *  *Alegeți o singura opțiune*   - - ½ băutură (sau mai puțin)   - 1 băutură   - 2 băuturi   - 3 băuturi   - 4 băuturi (sau mai multe)   **Băuturi alcoolice tari**  14. În ultimele 4 săptămâni, cât de des ați băut băuturi alcoolice cu conținut crescut de alcool (de ex. rom, cogniac, lichior, votcă, țuică)? *  *Alegeți o singura opțiune*   - - Niciodată   - 1 dată pe lună   - de 2-3 ori pe lună   - de 1-2 ori pe săptămână   - de 3-4 ori pe săptămână   - de 5-6 ori pe săptămână   - 1 dată pe zi   - de 2 ori pe zi   - de 3 ori pe zi   - de 4-5 ori pe zi   - mai frecvent de 5 ori pe zi   **Băuturi alcoolice tari**  14a. Când consumați tărie, cât de mult beți, cel mai frecvent? *  *Alegeți o singura opțiune*   - - 1/2 pahar   - 1 pahar (20 ml)   - 2 pahare   - 3 pahare   - 4 pahare (sau mai mult)   - Other:   **Cereale dulci**  15. În ultimele 4 săptămâni, de câte ori ați consumat cereale dulci pentru micul dejun (inclusiv fulgi de porumb, Fitness, ....) ? *  *Alegeți o singura opțiune*   - - Niciodată   - 1 dată pe lună   - de 2-3 ori pe lună   - de 1-2 ori pe săptămână   - de 3-4 ori pe săptămână   - de 5-6 ori pe săptămână   - 1 dată pe zi   - de 2 ori pe zi   - de 3 ori pe zi   - de 4-5 ori pe zi   - mai frecvent de 5 ori pe zi   **Cereale dulci**  15a. Când consumați cereale dulci, cât de mult mâncați, cel mai frecvent? Vă rugăm să nu includeți laptele. *  *Alegeți o singura opțiune*   - - ¼ bol (sau mai putin)   - ½ bol   - 1 bol (125 ml)   - 2 boluri   - 3 boluri (sau mai mult)   **Musli**  16. În ultimele 4 săptămâni, de câte ori ați consumat musli? *  *Alegeți o singura opțiune*   - - Niciodată   - 1 dată pe lună   - de 2-3 ori pe lună   - de 1-2 ori pe săptămână   - de 3-4 ori pe săptămână   - de 5-6 ori pe săptămână   - 1 dată pe zi   - de 2 ori pe zi   - de 3 ori pe zi   - de 4-5 ori pe zi   - mai frecvent de 5 ori pe zi   **Musli**  16a. Când consumați musli, cât de mult mâncați, cel mai frecvent? Vă rugăm să nu includeți laptele. *  *Alegeți o singura opțiune*   - - ¼ bol (sau mai putin)   - ½ bol   - 1 bol (125 ml)   - 2 boluri   - 3 boluri (sau mai mult)   **Pâine integrală**  17. În ultimele 4 săptămâni, cât de des ați mâncat pâine integrală ? *  *Alegeți o singura opțiune*   - - Niciodată   - 1 dată pe lună   - de 2-3 ori pe lună   - de 1-2 ori pe săptămână   - de 3-4 ori pe săptămână   - de 5-6 ori pe săptămână   - 1 dată pe zi   - de 2 ori pe zi   - de 3 ori pe zi   - de 4-5 ori pe zi   - mai frecvent de 5 ori pe zi   **Pâine integrală**  17a. Când consumați pâine integrală, cât de mult mâncați, cel mai frecvent? *  *Alegeți o singura opțiune*   - - ½ felie sau ½ chiflă (sau mai puțin)   - 1 felie sau 1 chiflă   - 2 felii sau 2 chifle   - 3 felii sau 3 chifle   - 4 felii (sau mai multe)   **Pâine neagră sau pâine de secară**  18. În ultimele 4 săptămâni, de câte ori ați consumat pâine neagră sau pâine de secară? *  *Alegeți o singura opțiune*   - - Niciodată   - 1 dată pe lună   - de 2-3 ori pe lună   - de 1-2 ori pe săptămână   - de 3-4 ori pe săptămână   - de 5-6 ori pe săptămână   - 1 dată pe zi   - de 2 ori pe zi   - de 3 ori pe zi   - de 4-5 ori pe zi   - mai frecvent de 5 ori pe zi   **Pâine neagră sau de secară**  18a. Când consumați pâine neagră și de secară, cât de mult mâncați, cel mai frecvent? *  *Alegeți o singura opțiune*   - - ½ felie sau ½ chiflă (sau mai puțin)   - 1 felie sau 1 chiflă   - 2 felii sau 2 chifle   - 3 felii sau 3 chifle   - 4 felii (sau mai multe)   **Pâine albă**  19. În ultimele 4 săptămâni, de câte ori ați consumat pâine albă (inclusiv pâine fără drojdie)? *  *Alegeți o singura opțiune*   - - Niciodată   - 1 dată pe lună   - de 2-3 ori pe lună   - de 1-2 ori pe săptămână   - de 3-4 ori pe săptămână   - de 5-6 ori pe săptămână   - 1 dată pe zi   - de 2 ori pe zi   - de 3 ori pe zi   - de 4-5 ori pe zi   - mai frecvent de 5 ori pe zi   **Pâine albă**  19a. Când consumați pâine albă, cât de mult mâncați, cel mai frecvent? *  *Alegeți o singura opțiune*   - - ½ felie sau ½ chiflă (sau mai puțin)   - 1 felie sau 1 chiflă   - 2 felii sau 2 chifle   - 3 felii sau 3 chifle   - 4 felii (sau mai multe)   **Unt sau margarină**  20. În ultimele 4 săptămâni, de câte ori ați consumat unt sau margarină? *  *Alegeți o singura opțiune*   - - Niciodată   - 1 dată pe lună   - de 2-3 ori pe lună   - de 1-2 ori pe săptămână   - de 3-4 ori pe săptămână   - de 5-6 ori pe săptămână   - 1 dată pe zi   - de 2 ori pe zi   - de 3 ori pe zi   - de 4-5 ori pe zi   - mai frecvent de 5 ori pe zi   **Unt sau margarină**  20a. Când consumați unt sau margarină, cât de mult mâncați, cel mai frecvent? *  *Alegeți o singura opțiune*   - - ½ linguriță (sau mai puțin)   - 1 lingurita (rasă)   - 2 lingurite (rase)   - 3 lingurițe (rase)   - 4 lingurite (sau mai mult)   **Cremă de brânză / Brânză tartinabilă**  21. În ultimele 4 săptămâni, de câte ori ați consumat brânză tartinabilă (Philadelphia, Almette)? *  *Alegeți o singura opțiune*   - - Niciodată   - 1 dată pe lună   - de 2-3 ori pe lună   - de 1-2 ori pe săptămână   - de 3-4 ori pe săptămână   - de 5-6 ori pe săptămână   - 1 dată pe zi   - de 2 ori pe zi   - de 3 ori pe zi   - de 4-5 ori pe zi   - mai frecvent de 5 ori pe zi   **Cremă de brânză / Brânză tartinabilă**  21a. Când consumați cremă de brânză, cât de mult mâncați, cel mai frecvent? *  *Alegeți o singura opțiune*   - - ½ lingură (sau mai puțin)   - 1 lingură (rasă)   - 2 linguri (rase)   - 3 linguri (rase)   - 4 linguri (sau mai mult)   21b. Consumați de obicei cremă de brânză degresată? *  *Alegeți o singura opțiune*   - - Rareori sau niciodată   - Aproape în jumătate din situații   - Predominant   - Nu știu   **Brânzeturi**  22. În ultimele 4 săptămâni, de câte ori ați consumat brânză (telemea, cașcaval, mozzarella)? Nu intră aici brânza dulce. *  *Alegeți o singura opțiune*   - - Niciodată   - 1 dată pe lună   - de 2-3 ori pe lună   - de 1-2 ori pe săptămână   - de 3-4 ori pe săptămână   - de 5-6 ori pe săptămână   - 1 dată pe zi   - de 2 ori pe zi   - de 3 ori pe zi   - de 4-5 ori pe zi   - mai frecvent de 5 ori pe zi   **Brânzeturi**  22a. Când consumați brânzeturi (telemea, cașcaval, mozzarella), cât de mult mâncați, cel mai frecvent? *  *Alegeți o singura opțiune*   - - ½ felie sau ½ portie (sau mai puțin)   - 1 felie sau 1 porție   - 2 felii sau 2 porții   - 3 felii sau 3 porții   - 4 felii sau 4 porții (sau mai mult)   22b. Consumați de obicei brânzeturi degresate? *  *Alegeți o singura opțiune*   - - Rareori sau niciodată   - Aproape în jumătate din situații   - Predominant   - Nu știu   **Lactate fermentate**  23. În ultimele 4 săptămâni, de câte ori ați consumat iaurt, kefir, lapte bătut, brânză dulce, brânză? *  *Alegeți o singura opțiune*   - - Niciodată   - 1 dată pe lună   - de 2-3 ori pe lună   - de 1-2 ori pe săptămână   - de 3-4 ori pe săptămână   - de 5-6 ori pe săptămână   - 1 dată pe zi   - de 2 ori pe zi   - de 3 ori pe zi   - de 4-5 ori pe zi   - mai frecvent de 5 ori pe zi   **Lactate fermentate**  23a. Când consumați lactate fermentate, cât de mult mâncați, cel mai frecvent? *  *Alegeți o singura opțiune*   - - ½ pahar (sau mai putin)   - 1 pahar (200 g)   - 2 pahare   - 3 pahare   - 4 pahar   23b. Consumați de obicei lactate fermentate degresate? *  *Alegeți o singura opțiune*   - - Rareori sau niciodată   - Aproape în jumătate din situații   - Predominant   - Nu știu   **Miere / gem / dulceață / marmeladă / sirop**  24. În ultimele 4 săptămâni, de câte ori ați consumat miere sau gemuri/dulcețuri/sirop? *  *Alegeți o singura opțiune*   - - Niciodată   - 1 dată pe lună   - de 2-3 ori pe lună   - de 1-2 ori pe săptămână   - de 3-4 ori pe săptămână   - de 5-6 ori pe săptămână   - 1 dată pe zi   - de 2 ori pe zi   - de 3 ori pe zi   - de 4-5 ori pe zi   - mai frecvent de 5 ori pe zi   **Miere / gem / dulceață / marmeladă /sirop**  24a. Când consumați miere sau dulceață cât de mult mâncați, cel mai frecvent? *  *Alegeți o singura opțiune*   - - 1 linguriță sau mai puțin   - 2 lingurițe (cu vârf)   - 3 lingurițe (cu vârf)   - 4 lingurițe (cu vârf)   - 5 lingurite (sau mai mult)   **Cremă de ciocolată**  25. În ultimele 4 săptămâni, de câte ori ați consumat cremă de ciocolată tartinabilă (Nutella, Finetti)? *  *Alegeți o singura opțiune*   - - Niciodată   - 1 dată pe lună   - de 2-3 ori pe lună   - de 1-2 ori pe săptămână   - de 3-4 ori pe săptămână   - de 5-6 ori pe săptămână   - 1 dată pe zi   - de 2 ori pe zi   - de 3 ori pe zi   - de 4-5 ori pe zi   - mai frecvent de 5 ori pe zi   **Cremă de ciocolată**  25a. Când consumați cremă de ciocolată cât de mult mâncați, cel mai frecvent? *  *Alegeți o singura opțiune*   - - 1 linguriță sau mai puțin   - 2 lingurițe cu vârf   - 3 lingurițe cu vârf   - 4 lingurițe cu vârf   - 5 lingurite (sau mai mult)   **Ouă**  26. În ultimele 4 săptămâni, cât de des ați mâncat ouă (de exemplu, ouă prăjite, papară, omletă, ouă fierte)? *  *Alegeți o singura opțiune*   - - Niciodată   - 1 dată pe lună   - de 2-3 ori pe lună   - de 1-2 ori pe săptămână   - de 3-4 ori pe săptămână   - de 5-6 ori pe săptămână   - 1 dată pe zi   - de 2 ori pe zi   - de 3 ori pe zi   - de 4-5 ori pe zi   - mai frecvent de 5 ori pe zi   **Ouă**  26a. Când consumați ouă cât de mult mâncați, cel mai frecvent? *  *Alegeți o singura opțiune*   - - ½ ou (sau mai puțin)   - 1 ou   - 2 ouă   - 3 ouă   - 4 ouă (sau mai mult)   **Carne de pasăre**  27. În ultimele 4 săptămâni, de câte ori ați mâncat carne de pasăre? *  *Alegeți o singura opțiune*   - - Niciodată   - 1 dată pe lună   - de 2-3 ori pe lună   - de 1-2 ori pe săptămână   - de 3-4 ori pe săptămână   - de 5-6 ori pe săptămână   - 1 dată pe zi   - de 2 ori pe zi   - de 3 ori pe zi   - de 4-5 ori pe zi   - mai frecvent de 5 ori pe zi   **Carne de pasăre**  27a. Când consumați carne de pasăre cât de mult mâncați, cel mai frecvent? O porție înseamnă aproximativ 1 picior de pui sau 8 nuggets. *  *Alegeți o singura opțiune*   - - ¼ porție (sau mai puțin)   - ½ porție   - 1 porție   - 2 porții   - 3 porții (sau mai mult)   27b. Cât de frecvent consumați carnea de pasăre pane sau prajită în ulei (friteuza)? *  *Alegeți o singura opțiune*   - - (Aproape) niciodată   - Aproximativ ¼ din consum   - Aproximativ jumătate din consum   - Aproximativ ¾ din consum   - (Aproape) întotdeauna   **Fast-food**  28. În ultimele 4 săptămâni, de câte ori ați mâncat fast-food: hamburgeri, kebap, shaworma sau plescavita? *  *Alegeți o singura opțiune*   - - Niciodată   - 1 dată pe lună   - de 2-3 ori pe lună   - de 1-2 ori pe săptămână   - de 3-4 ori pe săptămână   - de 5-6 ori pe săptămână   - 1 dată pe zi   - de 2 ori pe zi   - de 3 ori pe zi   - de 4-5 ori pe zi   - mai frecvent de 5 ori pe zi   **Fast-food**  28a. Când consumați fast-food, cât de mult mâncați, cel mai frecvent? *  *Alegeți o singura opțiune*   - - ½ buc (sau mai puțin)   - 1 bucată   - 2 bucăți   - 3 bucăți   - 4 bucăți (sau mai mult)   **Cârnați / polonezi / crenvursti**  29. În ultimele 4 săptămâni, de câte ori ați consumat cârnați / polonezi / crenvursti? *  *Alegeți o singura opțiune*   - - Niciodată   - 1 dată pe lună   - de 2-3 ori pe lună   - de 1-2 ori pe săptămână   - de 3-4 ori pe săptămână   - de 5-6 ori pe săptămână   - 1 dată pe zi   - de 2 ori pe zi   - de 3 ori pe zi   - de 4-5 ori pe zi   - mai frecvent de 5 ori pe zi   **Cârnați / polonezi / crenvursti**  29a. Când consumați cârnați / polonezi / crenvursti, cât de mult mâncați, cel mai frecvent? *  *Alegeți o singura opțiune*   - - ½ buc (sau mai puțin)   - 1 bucată   - 2 bucăți   - 3 bucăți   - 4 bucăți (sau mai mult)   **Carne roșie**  30. În ultimele 4 săptămâni, cât de des ați mâncat carne (de exemplu, carne de porc, de vită, vânat)? Nu intră aici cârnații și carnea de pasăre. *  *Alegeți o singura opțiune*   - - Niciodată   - 1 dată pe lună   - de 2-3 ori pe lună   - de 1-2 ori pe săptămână   - de 3-4 ori pe săptămână   - de 5-6 ori pe săptămână   - 1 dată pe zi   - de 2 ori pe zi   - de 3 ori pe zi   - de 4-5 ori pe zi   - mai frecvent de 5 ori pe zi   **Carne roșie**  30a. Când mâncați carne roșie, cât de multă mâncați, cel mai frecvent? Prin ”o porție” se înțelege 1 felie cotlet, 1 felie de friptură, 1 șnițel cât palma *  *Alegeți o singura opțiune*   - - ¼ porție (sau mai puțin)   - ½ porție   - 1 porție   - 2 porții   - 3 porții (sau mai mult)   30b. Cât de des carnea a fost făcută pane ( de exemplu, șnițel)? *  *Alegeți o singura opțiune*   - - (aproape) niciodată   - aproximativ la ¼ din ocaziile de consum   - aproximativ jumătate din ocaziile de consum   - aproximativ ¾ din ocaziile de consum   - (aproape) întotdeauna   **Salamuri / mezeluri**  31. În ultimele 4 săptămâni, cât de des ați consumat salamuri (inclusiv caltaboș, sângerete, tobă, pateuri). Nu intră aici șunca. *  *Alegeți o singura opțiune*   - - Niciodată   - 1 dată pe lună   - de 2-3 ori pe lună   - de 1-2 ori pe săptămână   - de 3-4 ori pe săptămână   - de 5-6 ori pe săptămână   - 1 dată pe zi   - de 2 ori pe zi   - de 3 ori pe zi   - de 4-5 ori pe zi   - mai frecvent de 5 ori pe zi   **Salamuri / mezeluri**  31a. Când mâncați salamuri (inclusiv caltaboș, sângerete, tobă, pateuri), cât de mult mâncați, cel mai frecvent? *  *Alegeți o singura opțiune*   - - ½ felie   - 1 felie   - 2 felii   - 3 felii   - 4 felii sau mai multe   31b. Alegeți să mâncați salamuri (inclusiv caltaboș, sângerete, tobă, pateuri) sărace în grăsimi? *  *Alegeți o singura opțiune*   - - rareori sau niciodată   - aproape jumătate din consum   - predominant   - nu știu   **Șuncă**  32. În ultimele 4 săptămâni, cât de des ați mâncat șuncă? *  *Alegeți o singura opțiune*   - - Niciodată   - 1 dată pe lună   - de 2-3 ori pe lună   - de 1-2 ori pe săptămână   - de 3-4 ori pe săptămână   - de 5-6 ori pe săptămână   - 1 dată pe zi   - de 2 ori pe zi   - de 3 ori pe zi   - de 4-5 ori pe zi   - mai frecvent de 5 ori pe zi   **Șuncă**  32a. Când mâncați șuncă, cât de mult mâncați, cel mai frecvent? *  *Alegeți o singura opțiune*   - - ½ felie   - 1 felie   - 2 felii   - 3 felii   - 4 felii sau mai multe   **Pește din conservă, pește marinat sau afumat**  33. În ultimele 4 săptămâni, cât de des ați mâncat pește din conservă, pește marinat sau afumat (de exemplu, somon afumat, macrou afumat, ton din conservă)? *  *Alegeți o singura opțiune*   - - Niciodată   - 1 dată pe lună   - de 2-3 ori pe lună   - de 1-2 ori pe săptămână   - de 3-4 ori pe săptămână   - de 5-6 ori pe săptămână   - 1 dată pe zi   - de 2 ori pe zi   - de 3 ori pe zi   - de 4-5 ori pe zi   - mai frecvent de 5 ori pe zi   **Pește din conservă, pește marinat sau afumat**  33a. Când mâncați pește din conservă, pește marinat sau afumat, cât de multă mâncați, cel mai frecvent? Printr-o porție se înțelege o cantitate care ar acoperi o felie de pâine. *  *Alegeți o singura opțiune*   - - ¼ porție (sau mai puțin)   - ½ porție   - 1 portie   - 2 porții   - 3 porții (sau mai mult)   **Pește gătit**  34. În ultimele 4 săptămâni cât de des ați mâncat pește gătit, ca fel principal (de exemplu somon, păstrăv)? *  *Alegeți o singura opțiune*   - - Niciodată   - 1 dată pe lună   - de 2-3 ori pe lună   - de 1-2 ori pe săptămână   - de 3-4 ori pe săptămână   - de 5-6 ori pe săptămână   - 1 dată pe zi   - de 2 ori pe zi   - de 3 ori pe zi   - de 4-5 ori pe zi   - mai frecvent de 5 ori pe zi   **Pește gătit**  34a. Când mâncați pește gătit, ca fel principal, cât de mult mâncați, cel mai frecvent? * Printr-o porție se înțelege o cantitate cât 1 file de pește sau cât un bastonaș de pește pané din comerț. *  *Alegeți o singura opțiune*   - - ¼ porție sau mai puțin   - ½ porție   - 1 portie   - 2 porții   - 3 porții sau mai mult   34b. Cât de des a fost peștele gătit pané sau prăjit? *  *Alegeți o singura opțiune*   - - (aproape) niciodată   - aproximativ la ¼ din ocaziile de consum   - aproximativ jumătate din ocaziile de consum   - aproximativ ¾ din ocaziile de consum   - (aproape) întotdeauna   **Fructe proaspete**  35. În ultimele 4 săptămâni, cât de des ați consumat fructe proaspete (de exemplu, mere, banane, cireșe, piersici)? *  *Alegeți o singura opțiune*   - - Niciodată   - 1 dată pe lună   - de 2-3 ori pe lună   - de 1-2 ori pe săptămână   - de 3-4 ori pe săptămână   - de 5-6 ori pe săptămână   - 1 dată pe zi   - de 2 ori pe zi   - de 3 ori pe zi   - de 4-5 ori pe zi   - mai frecvent de 5 ori pe zi   **Fructe proaspete**  35a. Când mâncați fructe proaspete, cât de mult mâncați, cel mai frecvent? * 1 bucată este, de exemplu, 1 măr sau 1 banană. Bolul este unul mic, bol de desert, de 150ml, de exemplu cu căpșuni sau cireșe. *  *Alegeți o singura opțiune*   - - ½ bucată sau ½ bol sau mai puțin   - 1 bucată sau 1 bol   - 2 bucăți sau 2 boluri   - 3 bucăți sau 3 boluri   - 4 bucăți sau 4 boluri sau mai mult   **Fructe preparate termic**  36. În ultimele 4 săptămâni, cât de des ați mâncat fructe fierte (de exemplu, compot sau fructe din conservă) *  *Alegeți o singura opțiune*   - - Niciodată   - 1 dată pe lună   - de 2-3 ori pe lună   - de 1-2 ori pe săptămână   - de 3-4 ori pe săptămână   - de 5-6 ori pe săptămână   - 1 dată pe zi   - de 2 ori pe zi   - de 3 ori pe zi   - de 4-5 ori pe zi   - mai frecvent de 5 ori pe zi   **Fructe preparate termic**  36a. Când mâncați fructe fierte, cât mâncați, cel mai frecvent? *Este vorba de un bol mic, de desert, de 150ml *  *Alegeți o singura opțiune*   - - ¼ bol (sau mai putin)   - ½ bol   - 1 bol   - 2 boluri   - 3 boluri (sau mai mult)   **Legume crude**  37. În ultimele 4 săptămâni, cât de des ați mâncat legume crude (de exemplu, salata verde, crudități etc) *  *Alegeți o singura opțiune*   - - Niciodată   - 1 dată pe lună   - de 2-3 ori pe lună   - de 1-2 ori pe săptămână   - de 3-4 ori pe săptămână   - de 5-6 ori pe săptămână   - 1 dată pe zi   - de 2 ori pe zi   - de 3 ori pe zi   - de 4-5 ori pe zi   - mai frecvent de 5 ori pe zi   **Legume crude**  37a. Când mâncați legume crude, cât de mult mâncați, cel mai frecvent? *O porție este cât putem ține în căușul a două mâini sau cât acoperă mijlocul unei farfurii plate *  *Alegeți o singura opțiune*   - - ¼ porție sau mai puțin   - ½ porție   - 1 portie   - 2 porții   - 3 porții sau mai mult   **Leguminoase uscate**  38. În ultimele 4 săptămâni, cât de des ați mâncat leguminoase uscate (de exemplu fasole, mazăre, linte)? *  *Alegeți o singura opțiune*   - - Niciodată   - 1 dată pe lună   - de 2-3 ori pe lună   - de 1-2 ori pe săptămână   - de 3-4 ori pe săptămână   - de 5-6 ori pe săptămână   - 1 dată pe zi   - de 2 ori pe zi   - de 3 ori pe zi   - de 4-5 ori pe zi   - mai frecvent de 5 ori pe zi   **Leguminoase uscate**  38a. Când mâncați leguminoase uscate (fasole, mazăre, linte), cât de mult mâncați, cel mai frecvent? *O porție înseamnă jumătate de farfurie *  *Alegeți o singura opțiune*   - - ¼ porție sau mai puțin   - ½ porție   - 1 portie   - 2 porții   - 3 porții sau mai mult   **Legume fierte / gătite**  39. În ultimele 4 săptămâni, cât de des ați mâncat legume fierte/gătite? *  *Alegeți o singura opțiune*   - - Niciodată   - 1 dată pe lună   - de 2-3 ori pe lună   - de 1-2 ori pe săptămână   - de 3-4 ori pe săptămână   - de 5-6 ori pe săptămână   - 1 dată pe zi   - de 2 ori pe zi   - de 3 ori pe zi   - de 4-5 ori pe zi   - mai frecvent de 5 ori pe zi   **Legume fierte / gătite**  39a. Când mâncați legume fierte/gătite, cât de mult mâncați, cel mai frecvent? *O porție este jumătate de farfurie *  *Alegeți o singura opțiune*   - - ¼ porție sau mai puțin   - ½ porție   - 1 portie   - 2 porții   - 3 porții sau mai mult   39b. Când mâncați legume fierte/gătite, acestea sunt de obicei: *  *Alegeți o singura opțiune*   - - legume proaspete   - legume congelate   - conservele de legume   - nu știu   **Paste făinoase**  40. În ultimele 4 săptămâni, cât de des ați mâncat paste (de exemplu, spaghetti, macaroane, lasagna, ravioli, tăiței, găluște)? *  *Alegeți o singura opțiune*   - - Niciodată   - 1 dată pe lună   - de 2-3 ori pe lună   - de 1-2 ori pe săptămână   - de 3-4 ori pe săptămână   - de 5-6 ori pe săptămână   - 1 dată pe zi   - de 2 ori pe zi   - de 3 ori pe zi   - de 4-5 ori pe zi   - mai frecvent de 5 ori pe zi   **Paste făinoase**  40a. Când mâncați paste, cât de mult mâncați, cel mai frecvent? *  *Alegeți o singura opțiune*   - - ¼ farfurie sau mai puțin   - ½ farfurie   - 1 farfurie   - 2 farfurii   - 3 farfurii sau mai mult   **Orez**  41. În ultimele 4 săptămâni, cât de des ați mâncat orez (intră aici și cuș-cuș, grâu bulgur, arpacaș)? *  *Alegeți o singura opțiune*   - - Niciodată   - 1 dată pe lună   - de 2-3 ori pe lună   - de 1-2 ori pe săptămână   - de 3-4 ori pe săptămână   - de 5-6 ori pe săptămână   - 1 dată pe zi   - de 2 ori pe zi   - de 3 ori pe zi   - de 4-5 ori pe zi   - mai frecvent de 5 ori pe zi   **Orez**  41a. Când mâncați orez (sau cuș-cuș, grâu bulgur, arpacaș), cât de mult mâncați, cel mai frecvent? *  *Alegeți o singura opțiune*   - - ¼ porție sau mai puțin   - ½ porție   - 1 portie   - 2 porții   - 3 porții sau mai mult   **Cartofi fierți**  42. În ultimele 4 săptămâni, cât de des ați mâncat cartofi fierți (de exemplu, fierți fără coajă/natur, fierți în coajă, găluște de cartofi)? *  *Alegeți o singura opțiune*   - - Niciodată   - 1 dată pe lună   - de 2-3 ori pe lună   - de 1-2 ori pe săptămână   - de 3-4 ori pe săptămână   - de 5-6 ori pe săptămână   - 1 dată pe zi   - de 2 ori pe zi   - de 3 ori pe zi   - de 4-5 ori pe zi   - mai frecvent de 5 ori pe zi   **Cartofi fierți**  42a. Când mâncați cartofi fierți, cât de mult mâncați, cel mai frecvent? * Ne referim la cartofi de mărime medie *  *Alegeți o singura opțiune*   - - ½ porție sau 1 cartof, sau mai puțin   - 1 porție sau 2 cartofi   - 1 ½ porții sau 3 cartofi   - 2 porții sau 4 cartofi   - 2 ½ porții sau 5 cartofi sau mai mult   **Specialități prăjite din cartofi**  43. În ultimele 4 săptămâni, cât de des ați mâncat specialități prăjite din cartofi (de exemplu, crochete sau clătite din cartofi)? Nu intră aici cartofii prăjiți. *  *Alegeți o singura opțiune*   - - Niciodată   - 1 dată pe lună   - de 2-3 ori pe lună   - de 1-2 ori pe săptămână   - de 3-4 ori pe săptămână   - de 5-6 ori pe săptămână   - 1 dată pe zi   - de 2 ori pe zi   - de 3 ori pe zi   - de 4-5 ori pe zi   - mai frecvent de 5 ori pe zi   **Specialități prăjite din cartofi**  43a. Când mâncați specialități prăjite din cartofi (de exemplu, crochete sau clătite din cartofi), cât de mult mâncați, cel mai frecvent? *  *Alegeți o singura opțiune*   - - ¼ farfurie sau 2 crochete, sau mai puțin   - ½ farfurie sau 4 crochete   - 1 farfurie sau 8 crochete   - 2 farfurii   - 3 farfurii sau mai mult   **Cartofi prăjiți**  44. În ultimele 4 săptămâni, cât de des ați mâncat cartofi prăjiți? *  *Alegeți o singura opțiune*   - - Niciodată   - 1 dată pe lună   - de 2-3 ori pe lună   - de 1-2 ori pe săptămână   - de 3-4 ori pe săptămână   - de 5-6 ori pe săptămână   - 1 dată pe zi   - de 2 ori pe zi   - de 3 ori pe zi   - de 4-5 ori pe zi   - mai frecvent de 5 ori pe zi   **Cartofi prăjiți**  44a. Când mâncați cartofi prăjiți, cât de mult mâncați , cel mai frecvent? *Prin o porție se înțelege o porție medie de la fast-food sau cât încape în două mâini. *  *Alegeți o singura opțiune*   - - ¼ porție sau mai puțin   - ½ porție   - 1 portie   - 2 porții   - 3 porții sau mai mult   **Pizza**  45. În ultimele 4 săptămâni, cât de des ați mâncat pizza? *  *Alegeți o singura opțiune*   - - Niciodată   - 1 dată pe lună   - de 2-3 ori pe lună   - de 1-2 ori pe săptămână   - de 3-4 ori pe săptămână   - de 5-6 ori pe săptămână   - 1 dată pe zi   - de 2 ori pe zi   - de 3 ori pe zi   - de 4-5 ori pe zi   - mai frecvent de 5 ori pe zi   **Pizza**  *O porție este cât o pizza congelată de 350g  45a. Când mâncați pizza, cât de mult mâncați, cel mai frecvent? *  *Alegeți o singura opțiune*   - - ¼ porție sau mai puțin   - ½ porție   - 1 portie   - 2 porții   - 3 porții sau mai mult   **Produse de cofetărie**  46. În ultimele 4 săptămâni, cât de des ați mâncat tort, prăjituri, patiserie dulce (inclusiv brioșe, bușeuri cu mere, baclava)? *  *Alegeți o singura opțiune*   - - Niciodată   - 1 dată pe lună   - de 2-3 ori pe lună   - de 1-2 ori pe săptămână   - de 3-4 ori pe săptămână   - de 5-6 ori pe săptămână   - 1 dată pe zi   - de 2 ori pe zi   - de 3 ori pe zi   - de 4-5 ori pe zi   - mai frecvent de 5 ori pe zi   **Produse de cofetărie**  46a. Când mâncați tort, prăjituri, patiserie dulce, cât de mult mâncați, cel mai frecvent? *  *Alegeți o singura opțiune*   - - ½ bucată sau mai puțin   - 1 bucată   - 2 bucăți   - 3 bucăți   - 4 bucăți sau mai mult   **Biscuiți**  47. În ultimele 4 săptămâni, cât de des ați mâncat biscuți (de exemplu biscuiți cu unt, fursecuri, cookies)? *  *Alegeți o singura opțiune*   - - Niciodată   - 1 dată pe lună   - de 2-3 ori pe lună   - de 1-2 ori pe săptămână   - de 3-4 ori pe săptămână   - de 5-6 ori pe săptămână   - 1 dată pe zi   - de 2 ori pe zi   - de 3 ori pe zi   - de 4-5 ori pe zi   - mai frecvent de 5 ori pe zi   **Biscuiți**  47a. Când mâncați biscuiți, cât mâncați, cel mai frecvent? *  *Alegeți o singura opțiune*   - - 2 biscuiți sau mai puțin   - 3 biscuiți   - 4 biscuiți   - 5 biscuiți   - 6 biscuiți sau mai mult   **Ciocolată**  48. În ultimele 4 săptămâni, cât de des ați mâncat ciocolată (inclusiv batoane de ciocolată, bomboane de ciocolată)? *  *Alegeți o singura opțiune*   - - Niciodată   - 1 dată pe lună   - de 2-3 ori pe lună   - de 1-2 ori pe săptămână   - de 3-4 ori pe săptămână   - de 5-6 ori pe săptămână   - 1 dată pe zi   - de 2 ori pe zi   - de 3 ori pe zi   - de 4-5 ori pe zi   - mai frecvent de 5 ori pe zi   **Ciocolată**  48a. Când mâncați ciocolată, cât de mult mâncați, cel mai frecvent? *O tablă de ciocolată este una standard de 100g. Un baton mic este un baton de tip Kinder. Un baton mare este unul de tip Mars. *  *Alegeți o singura opțiune*   - - ½ baton de ciocolată sau mai puțin   - ¼ tablă sau 1 baton mic ciocolată   - ½ tablă sau 1 baton mare de ciocolată   - 1 tablă sau 2 batoane mari de ciocolată   - 2 table sau mai mult   **Dulciuri**  49. În ultimele 4 săptămâni, cât de des ați mâncat dulciuri precum bomboane, jeleuri, rahat turcesc, bomboane de tuse? *  *Alegeți o singura opțiune*   - - Niciodată   - 1 dată pe lună   - de 2-3 ori pe lună   - de 1-2 ori pe săptămână   - de 3-4 ori pe săptămână   - de 5-6 ori pe săptămână   - 1 dată pe zi   - de 2 ori pe zi   - de 3 ori pe zi   - de 4-5 ori pe zi   - mai frecvent de 5 ori pe zi   **Dulciuri**  49a. Când mâncați dulciuri precum bomboane, jeleuri, rahat turcesc, bomboane de tuse, cât de mult mâncați, cel mai frecvent? *  *Alegeți o singura opțiune*   - - 1 bucată   - 2-5 bucăți   - 6-10 bucăți   - 11-20 bucăți   - 21 bucăți sau mai mult   **Înghețată**  50. În ultimele 4 săptămâni, cât de des ați mâncat înghețată? *  *Alegeți o singura opțiune*   - - Niciodată   - 1 dată pe lună   - de 2-3 ori pe lună   - de 1-2 ori pe săptămână   - de 3-4 ori pe săptămână   - de 5-6 ori pe săptămână   - 1 dată pe zi   - de 2 ori pe zi   - de 3 ori pe zi   - de 4-5 ori pe zi   - mai frecvent de 5 ori pe zi   **Înghețată**  50a. Când mâncați înghețată, cât de multă mâncați, cel mai frecvent? *  *Alegeți o singura opțiune*   - - ½ cupă sau mai puțin   - 1 cupă   - 2 cupă sau 1 înghețată pe băț   - 3 cupă   - 4 cupă sau mai multe   **Chipsuri**  51.În ultimele 4 săptămâni, cât de des ați mâncat chipsuri? *  *Alegeți o singura opțiune*   - - Niciodată   - 1 dată pe lună   - de 2-3 ori pe lună   - de 1-2 ori pe săptămână   - de 3-4 ori pe săptămână   - de 5-6 ori pe săptămână   - 1 dată pe zi   - de 2 ori pe zi   - de 3 ori pe zi   - de 4-5 ori pe zi   - mai frecvent de 5 ori pe zi   **Chipsuri**  51a. Când mâncați chipsuri, cât de mult mâncați, cel mai frecvent? *Este vorba de un bol mic, de desert, de 150ml *  *Alegeți o singura opțiune*   - - ¼ bol (sau mai putin)   - ½ bol   - 1 bol   - 2 boluri   - 3 boluri (sau mai mult)   **Sărățele / covrigei**  52. În ultimele 4 săptămâni, cât de des ați mâncat sărățele, covrigei, sticksuri, salatini? *  *Alegeți o singura opțiune*   - - Niciodată   - 1 dată pe lună   - de 2-3 ori pe lună   - de 1-2 ori pe săptămână   - de 3-4 ori pe săptămână   - de 5-6 ori pe săptămână   - 1 dată pe zi   - de 2 ori pe zi   - de 3 ori pe zi   - de 4-5 ori pe zi   - mai frecvent de 5 ori pe zi   **Sărățele / covrigei**  52a. Când mâncați sărățele, covrigei, sticksuri, salatini, cât de mult mâncați, cel mai frecvent? *  *Alegeți o singura opțiune*   - - ¼ bol (sau mai putin)   - ½ bol   - 1 bol   - 2 boluri   - 3 boluri (sau mai mult)   **Nuci / alune**  53. În ultimele 4 săptămâni cât de des ați mâncat nuci (de exemplu nuci, migdale, alune de pădure, arahide, fistic, nuci braziliene etc) ? *  *Alegeți o singura opțiune*   - - Niciodată   - 1 dată pe lună   - de 2-3 ori pe lună   - de 1-2 ori pe săptămână   - de 3-4 ori pe săptămână   - de 5-6 ori pe săptămână   - 1 dată pe zi   - de 2 ori pe zi   - de 3 ori pe zi   - de 4-5 ori pe zi   - mai frecvent de 5 ori pe zi   **Nuci / alune**  53a. Când mâncați nuci, cât de multe mâncați, cel mai frecvent? *O porție este cam cât putem ține într-o mână *  *Alegeți o singura opțiune*   - - ¼ porție sau mai puțin   - ½ porție   - 1 portie   - 2 porții   - 3 porții sau mai mult   **Pregătirea alimentelor**  54. Ce fel de grăsime folosiți de obicei la prepararea cărnii și a peștelui? *  *Alegeți o singura opțiune*   - - unt, margarină   - ulei de măsline   - grăsimi de gătit din plante (unt de palmier, de cocos)   - grăsimi animale de gătit (untură)   - ulei de floarea soarelui, ulei de germeni de porumb, ulei de rapiță etc.   - nu știu   55. Ce fel de grăsime folosiți de obicei la prepararea legumelor? *  *Alegeți o singura opțiune*   - - unt, margarină   - ulei de măsline   - grăsimi de gătit din plante (unt de palmier, de cocos)   - grăsimi animale de gătit (untură)   - ulei de floarea soarelui, ulei de germeni de porumb, ulei de rapiță etc.   - nu știu   - nu folosesc deloc   56. Mâncați, în mod obișnuit, vegetarian? *  *Alegeți o singura opțiune*   - - Nu   - Da   **Pregătirea alimentelor**  56a. Pe care dintre următoarele alimente evitați să le mâncați? Sunt posibile răspunsuri multiple.  *Bifati toate optiunile corecte*   - - carne roșie, carne de pasăre și cârnați   - pește   - lapte și produse lactate   - ouă   **Prepararea alimentelor**  57. De câte ori pe săptămână pregătiți, din ingrediente de bază/materii prime proaspete, o masă caldă (prânz sau cină)? *  *Alegeti o singura opțiune*   - - zilnic   - de 5-6 ori pe săptămână   - de 3-4 ori pe săptămână   - de 1-2 ori pe săptămână   - niciodată |

Bottom of Form
